# Supplementary material for: Morphogenesis mechanisms in the hydrothermal growth of lead-free BCZT nanostructured multipods
Source: Royal Society of Chemistry journal article supplement (doi:10.1039/d1ce00591j), 2021-01-01
Supplement: d1ce00591j1.pdf [file d1ce00591j1.pdf]

## Supplementary Information

### Morphogenesis mechanisms in the hydrothermal growth of lead-free BCZT nanostructured multipods

Zouhair Hanani,<sup>a,b,c</sup> El-houssaine Ablouh,<sup>d</sup> Soukaina Merselmiz,<sup>a</sup> Jaafar Ghanbaja,<sup>e</sup> M'barek Amjoud,<sup>a</sup> Daoud Mezzane,<sup>a,f</sup> Abdelhadi Alimoussa,<sup>a</sup> Mohammed Lahcini,<sup>a</sup> Matjaž Spreitzer,<sup>c</sup> Damjan Vengust,<sup>c</sup> Mimoun El Marssi,<sup>f</sup> Igor A. Luk'yanchuk,<sup>f,g,\*</sup> Zdravko Kutnjak,<sup>c</sup> and Mohamed Gouné<sup>b</sup>

<sup>a</sup> IMED-Lab, Cadi Ayyad University, Marrakesh, 40000, Morocco

<sup>b</sup> ICMCB, University of Bordeaux, Pessac, 33600, France

<sup>c</sup> Jozef Stefan Institute, Ljubljana, 1000, Slovenia

<sup>d</sup> MSN, Mohammed VI Polytechnic University, Ben Guerir, 43150, Morocco

<sup>e</sup> IJL, University of Lorraine, 54000, Nancy, France

<sup>f</sup> LPMC, University of Picardy Jules Verne, Amiens, 80039, France

<sup>g</sup> Department of Building Materials, Kyiv National University of Construction and Architecture, Kyiv, 03680, Ukraine

\* Corresponding author: e-mail: lukyanc@ferroix.net

## S1. Reagents and materials

Titanium isopropoxide ( $\text{Ti}(\text{OC}_3\text{H}_7)_4$ ,  $\geq 98.0\%$ ) was obtained from Merk, zirconium n-propoxide solution ( $\text{Zr}(\text{OCH}_2\text{CH}_2\text{CH}_3)_4$ , 70 wt. % in 1-propanol). Barium acetate ( $\text{Ba}(\text{CH}_3\text{COO})_2$ , ACS reagent, 99.0-102.0%) was obtained from Alfa Aesar. Calcium nitrate tetrahydrate ( $\text{Ca}(\text{NO}_3)_2 \cdot 4\text{H}_2\text{O}$ , ACS reagent, 99%), ethanol ( $\text{CH}_3\text{CH}_2\text{OH}$ , laboratory reagent, 96%), isopropanol ( $(\text{CH}_3)_2\text{CHOH}$ , ACS reagent,  $\geq 99.5\%$ ), sodium hydroxide pellets ( $\text{NaOH}$ , puriss. p.a. ACS reagent,  $\geq 98\%$ ), hydrochloric acid ( $\text{HCl}$ , ACS reagent, 37%) were purchased from Sigma Aldrich. Potassium hydroxide pellets ( $\text{KOH}$ , ACS Reagent,  $\geq 85\%$ ) was obtained from Honeywell Fluka. All reagents were used as received without further purification. Deionized water with resistivity of  $18.2 \text{ M}\Omega \text{ cm}^{-1}$  was obtained from a PURELAB-classic water purification system (ELGA LabWater), and was used for the experiments conducted in this work.

## S2. Morphogenesis in xByh powders

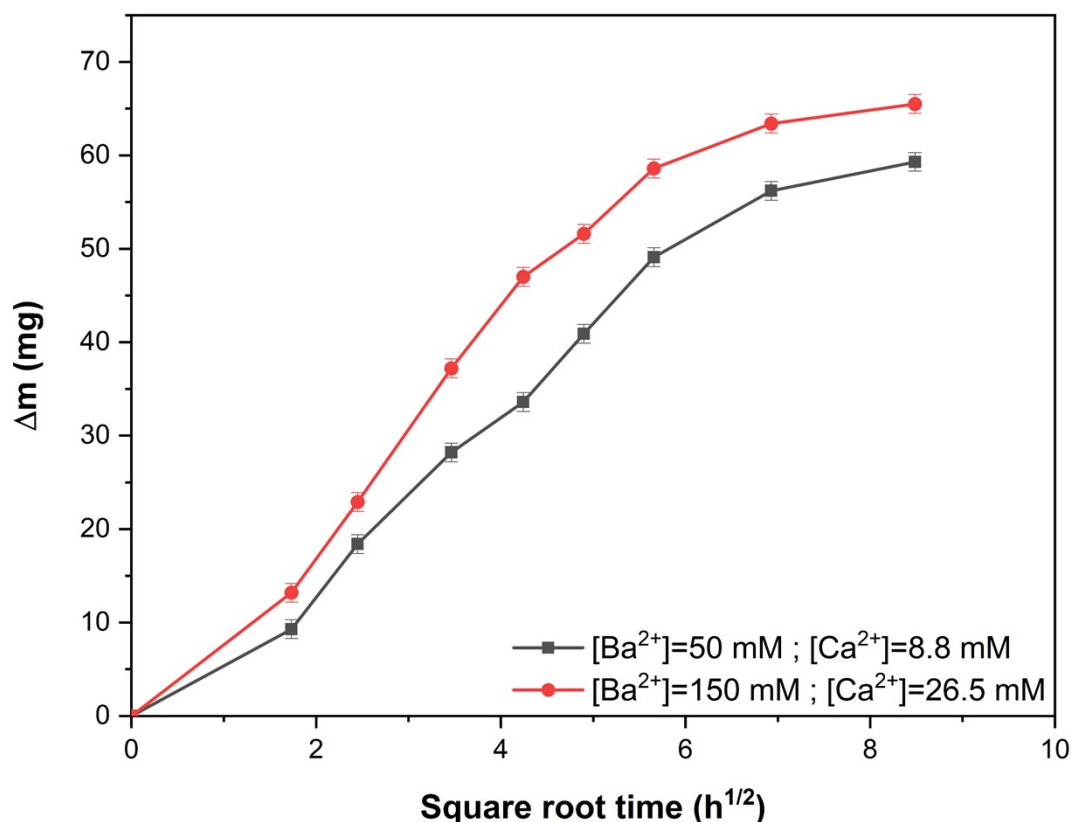

**Fig. S1** Variation of samples' weight as a function of the reaction time.

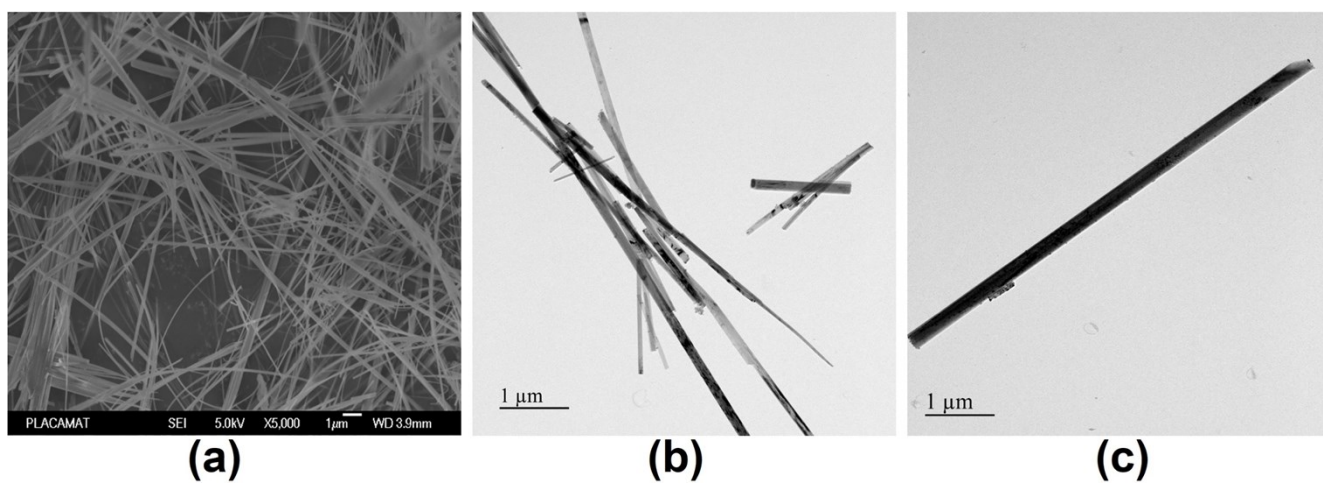

**Fig. S2** (a) FESEM and TEM images of (b) HZTO-NWs and (c) a single HZTO-NW.

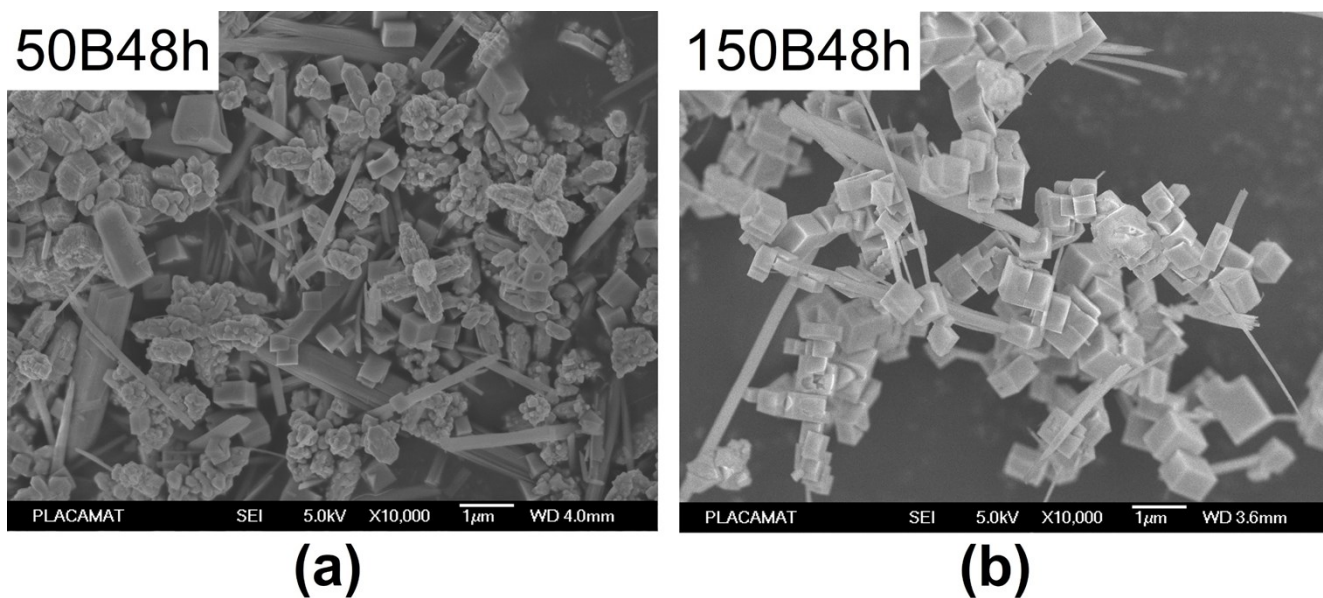

**Fig. S3** FESEM images indicating the effect of A-site concentrations on the morphogenesis of BCZT materials after 48 h of hydrothermal reaction, using (a) 50 mM of  $\text{Ba}^{2+}$  and (b) 150 mM of  $\text{Ba}^{2+}$ .

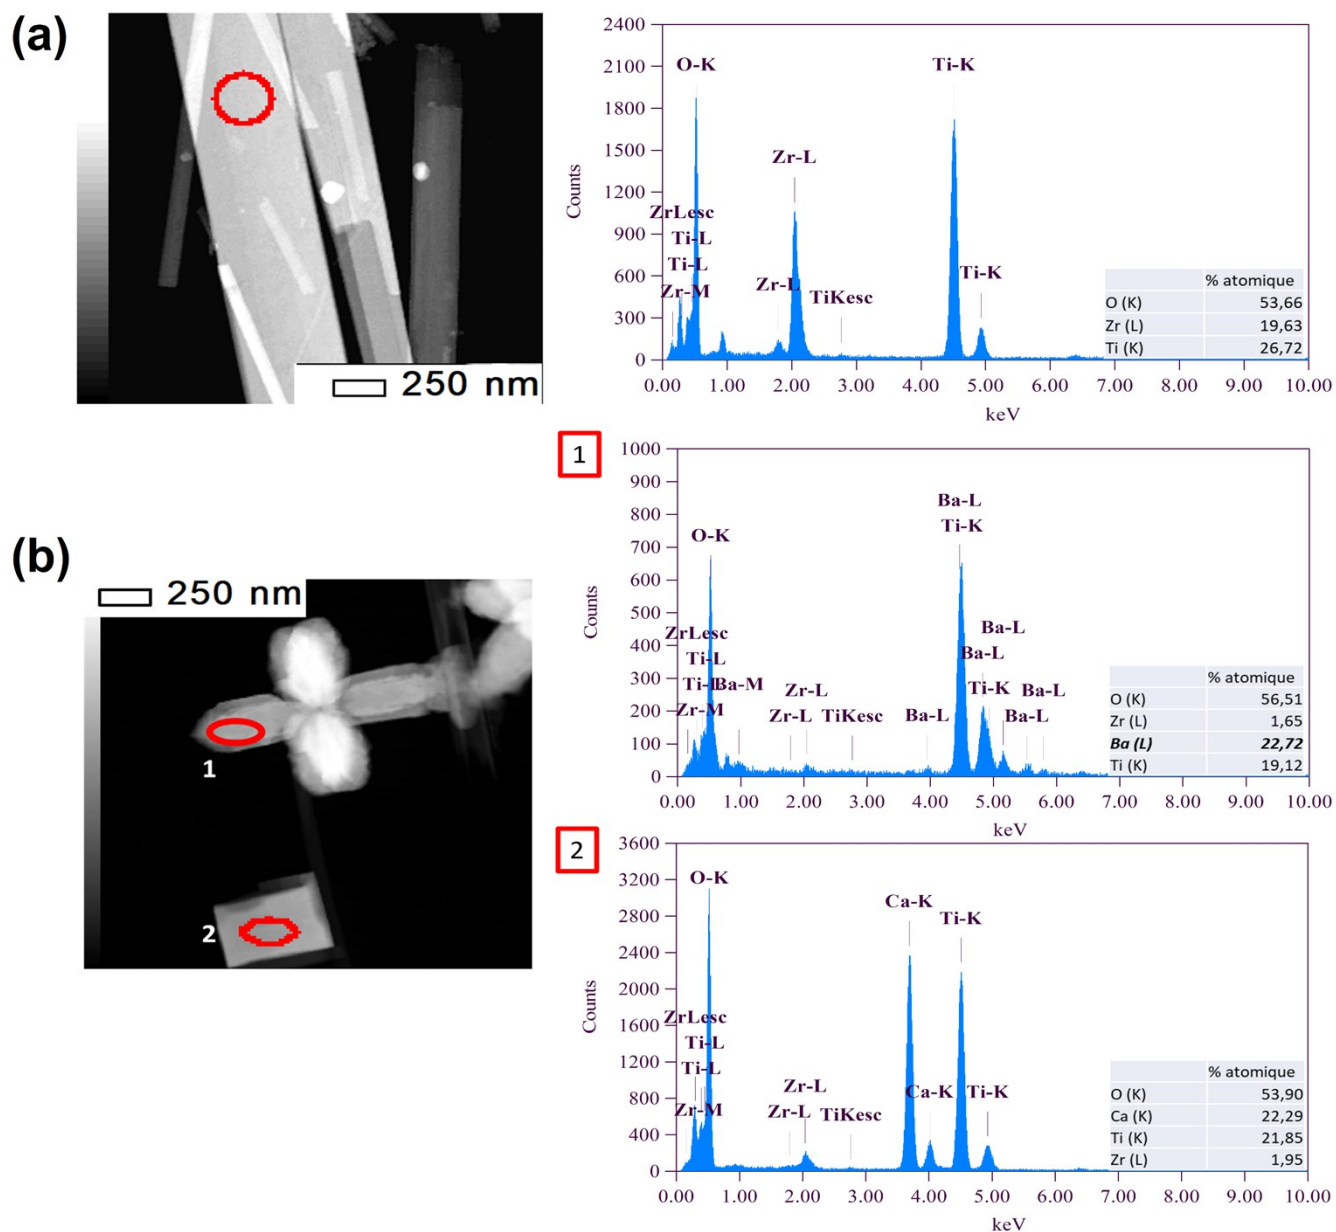

**Fig. S4** TEM images and EDS spectra of (a) wire and (b) cube and multipod.



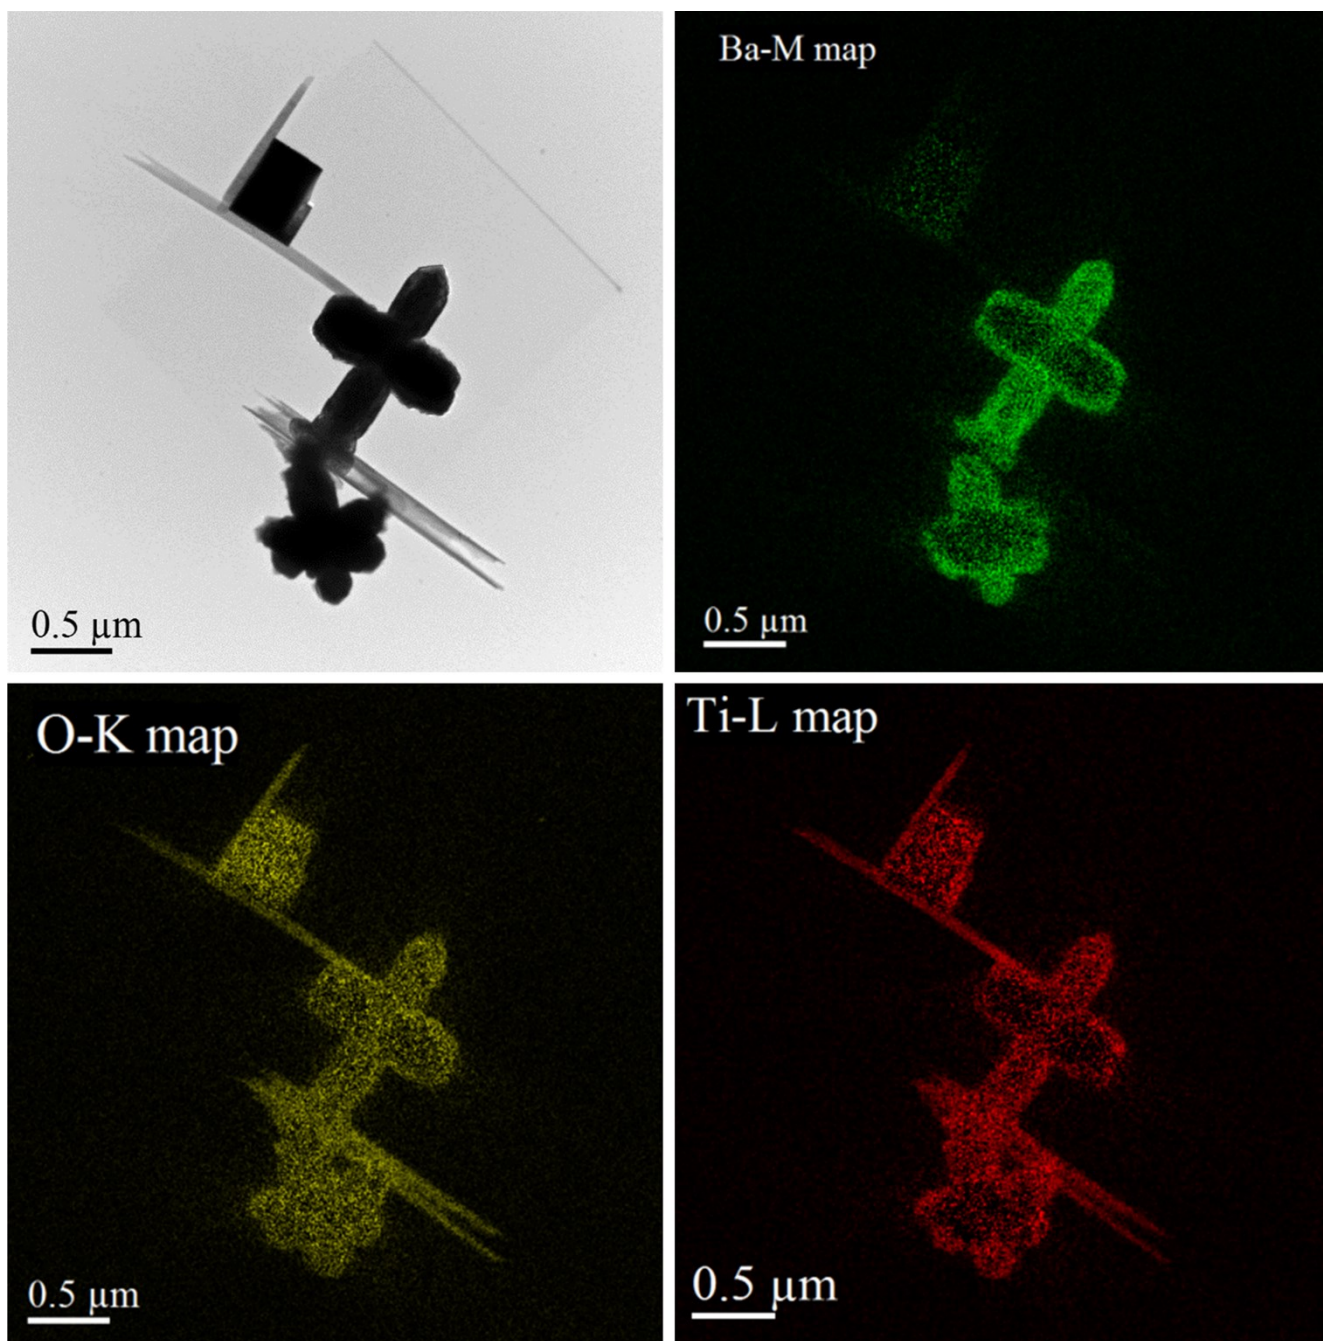

**Fig. S5** EFTEM mapping images demonstrating the chemical composition of wire, cube and multipod.

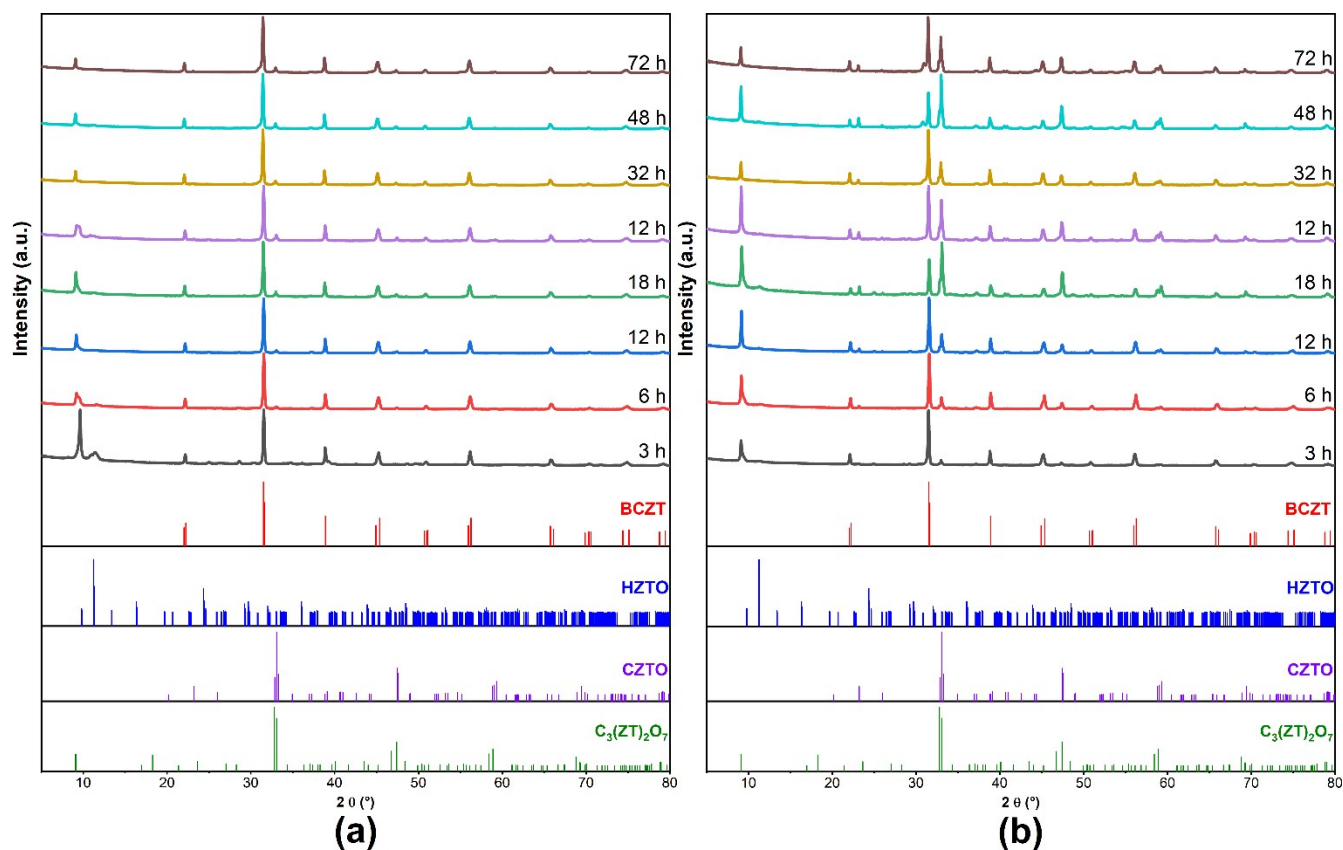

**Fig. S6** XRD patterns of different xByh powders elaborated using (a)  $\{[\text{Ba}^{2+}] = 50 \text{ mM}, [\text{Ca}^{2+}] = 8.8 \text{ mM}\}$  and (b)  $\{[\text{Ba}^{2+}] = 150 \text{ mM}, [\text{Ca}^{2+}] = 26.5 \text{ mM}\}$ , at various hydrothermal reaction times.

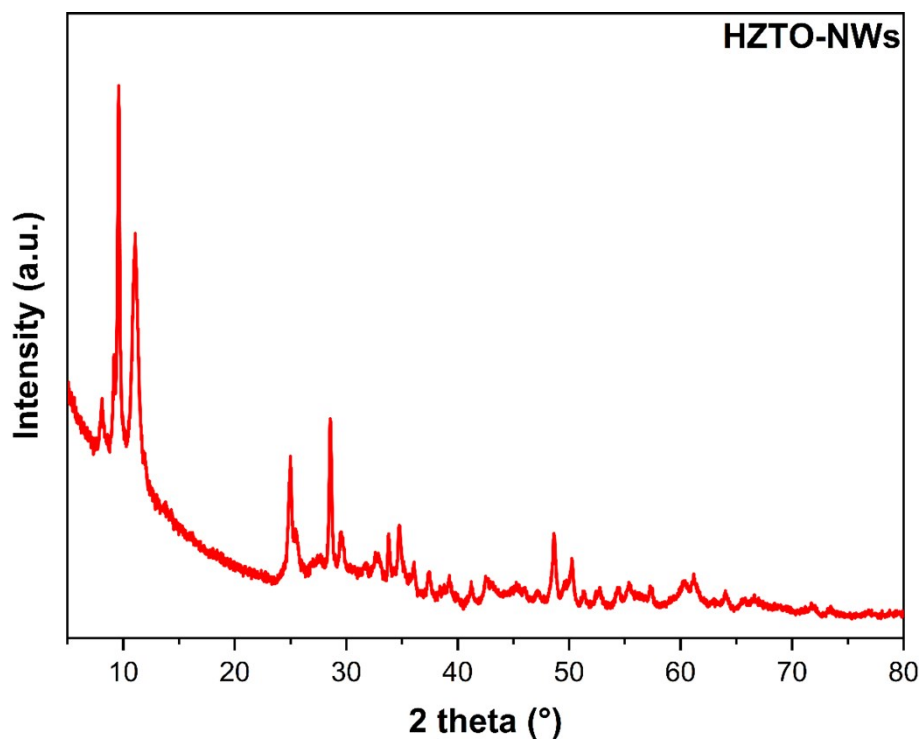

**Fig. S7** XRD pattern of HZTO-NWs.

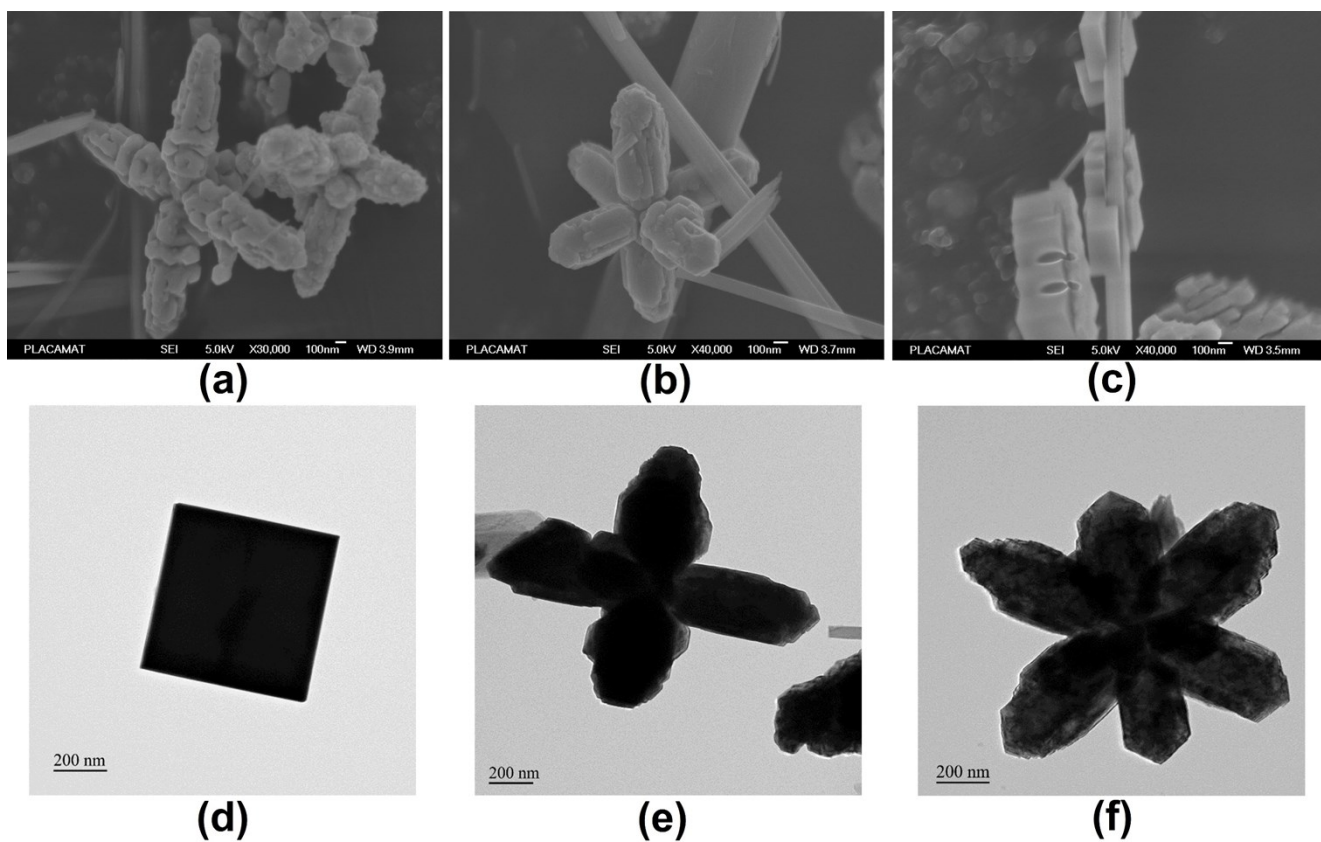

**Fig. S8** (a-c) FESEM and (d-f) TEM images of various loose nanostructures using 150 mM of  $\text{Ba}^{2+}$  and 26.5 mM of  $\text{Ca}^{2+}$ .

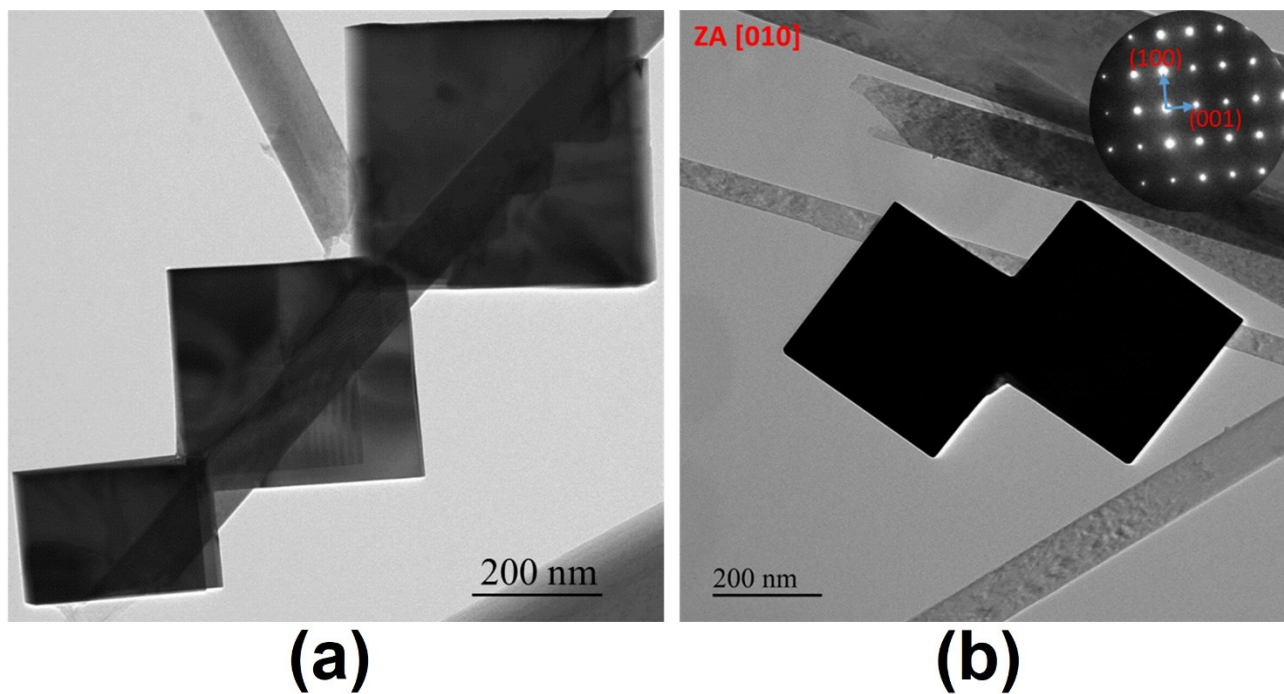

**Fig. S9** TEM images of (a) three edge-attached cubes and (b) two edge-attached cubes (SAED pattern in inset).
